# Supplementary material
Source: Springer Nature journal article supplement (https://www.springermedizin.de/resource/supplementary/13075_2010_9757_MOESM2_ESM.pdf/9693570)

Pt 1 OPN301

Pt 1 IgG1

Pt 2 OPN301

Pt 2 IgG1

(A)

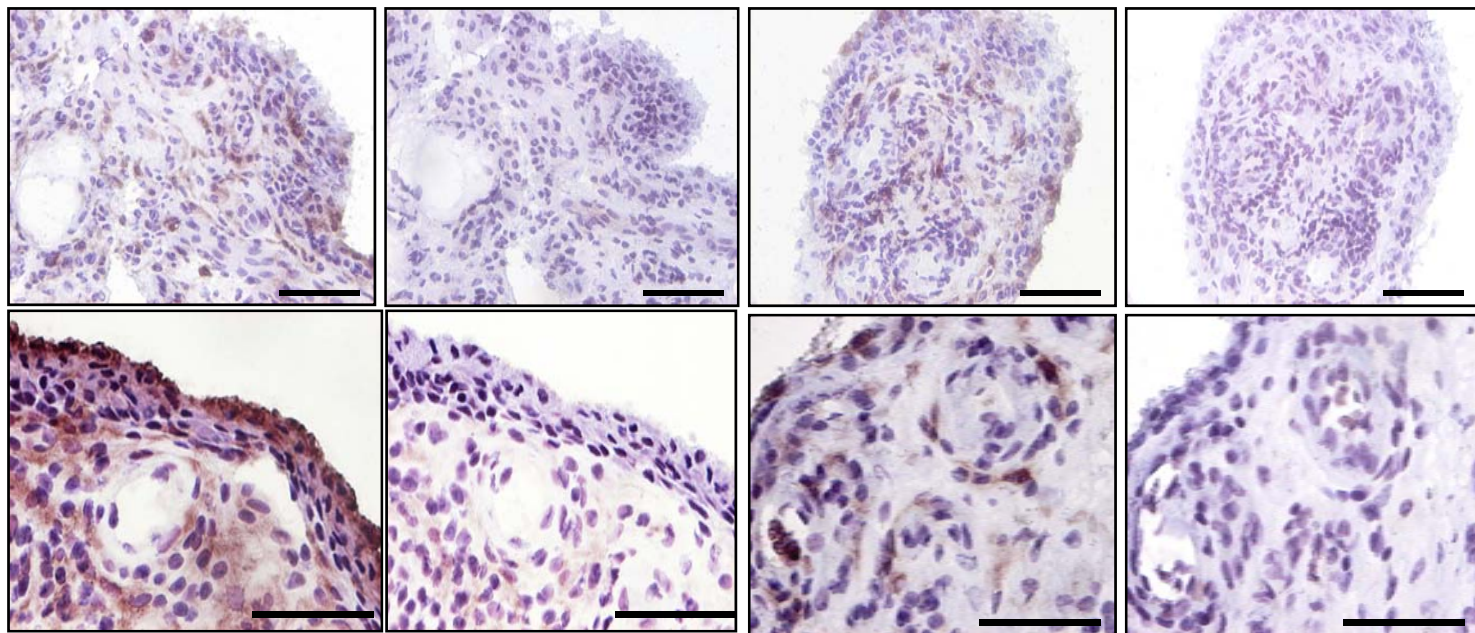

(B)

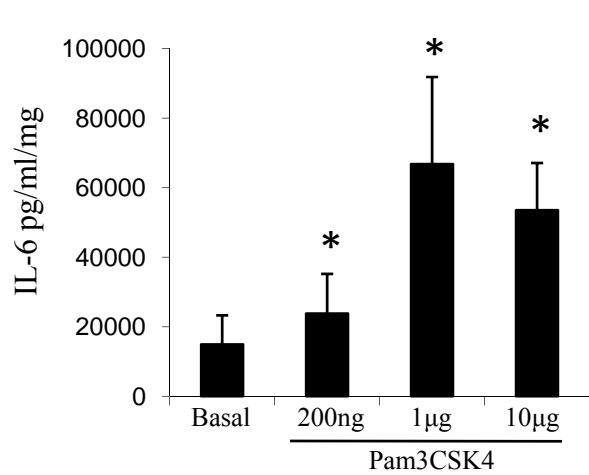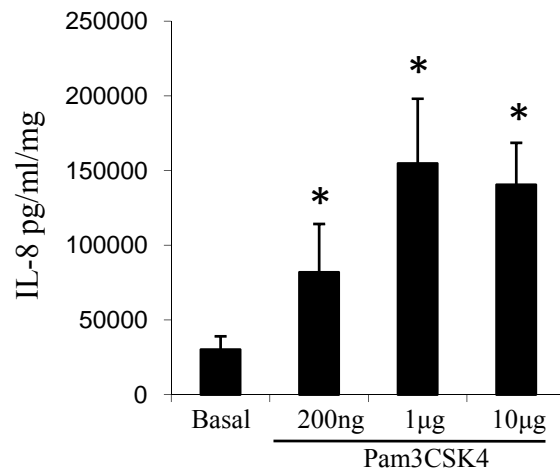

Supplement: MOESM2 [file 9693570]
